# Supplementary material for: Identification of nine new susceptibility loci for endometrial cancer
Source: PubMed Central journal article supplement (PMC6085317; doi:10.1038/s41467-018-05427-7), 2018-08-09
Supplement: 41467_2018_5427_MOESM3_ESM.pdf [file 41467_2018_5427_MOESM3_ESM.pdf]

## Description of Additional Supplementary Files

**File Name:** Supplementary Data 1

**Description:** Details of sample sets contributing to the endometrial cancer genetic association meta-analysis.

**File Name:** Supplementary Data 2

**Description:** Lead SNPs for all loci for which at least one SNP has meta-analysis  $P < 1 \times 10^{-6}$  for the all histologies analysis, for the endometrioid-only analysis or for the non-endometrioid histologies analysis.

**File Name:** Supplementary Data 3

**Description:** Candidate Causal Risk SNPs (ccrSNPs) for the novel risk loci and intersections with functional genomic features.

**File Name:** Supplementary Data 4

**Description:** Published genome-wide significant associations for cancer and hormonal/reproductive/anthropometric phenotypes within 500kb of the top hit at the newly identified endometrial cancer loci. Data from NHGRI-EBI catalog of published genome-wide association studies (<https://www.ebi.ac.uk/gwas/>) accessed on 11-05-2017.

**File Name:** Supplementary Data 5

**Description:** Expression quantitative trait loci (eQTL) summary statistics for Candidate Causal Risk SNPs (ccrSNPs) identified as eQTLs from blood, endometrium or endometrial cancer tumour tissue.

**File Name:** Supplementary Data 6

**Description:** Candidate causal genes for network analysis

**File Name:** Supplementary Data 7

**Description:** Biological pathway enrichment analysis of candidate causal gene network

**File Name:** Supplementary Data 8

**Description:** Genetic correlation between endometrial cancer and 224 traits from LDHub
